# Supplementary material for: Secretome identification of immune cell factors mediating metastatic cell homing
Source: PubMed Central journal article supplement (PMC4669442; doi:10.1038/srep17566), 2015-12-04
Supplement: srep17566-s1.pdf [file srep17566-s1.pdf]

**SUPPLEMENTARY INFORMATION****Secretome identification of immune cell factors mediating metastatic cell homing**

Brian A. Aguado, Jia J. Wu, Dhaval Nanavati, Samira M. Azarin, Shreyas S. Rao, Grace G. Bushnell, Chaitanya B. Medicherla, and Lonnie D. Shea

**Inventory of Supplementary Information**

Supplementary Figure 1

Supplementary Table 1

Supplementary Figure 2

Supplementary Figure 3

Supplementary Table 2

Supplementary Table 3

Supplementary Figure 4

Supplementary Figure 5

Supplementary Figure 6

Supplementary Figure 7

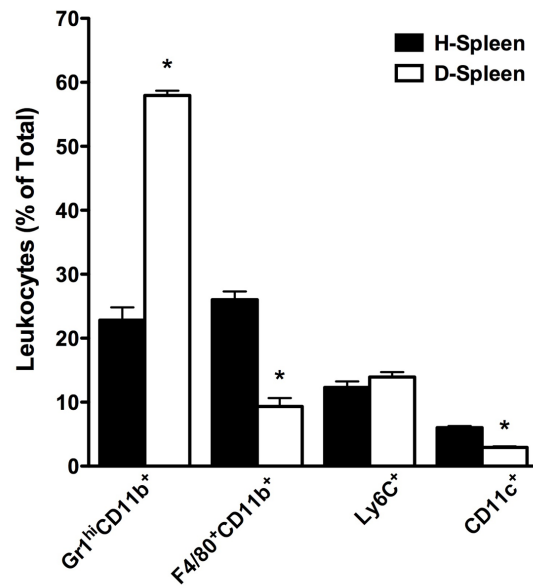

**Supplementary Figure 1 - Flow cytometric analysis of healthy (H-) and diseased (D-) spleens (day 28 post-inoculation) from NSG mice.** Results are shown as percentage of Gr1<sup>hi</sup>CD11b<sup>+</sup>, F4/80<sup>+</sup>CD11b<sup>+</sup>, Ly6C<sup>+</sup>, or CD11c<sup>+</sup> cells in the total population of CD45<sup>+</sup> leukocytes. Error bars denote SEM ( $n = 8$ , \* $p < 0.001$  compared to healthy spleen).

| Accession | Description                                                                                        | MW [kDa] | Length | #PSM - D-SCM1 | #PSM - D-SCM2 | #PSM - D-SCM3 | Average D-SCM | #PSM - H-SCM1 | #PSM - H-SCM2 | #PSM - H-SCM3 | Average H-SCM | Log2 Fold Change | P-Value |
|-----------|----------------------------------------------------------------------------------------------------|----------|--------|---------------|---------------|---------------|---------------|---------------|---------------|---------------|---------------|------------------|---------|
| P11247    | Myeloperoxidase OS=Mus musculus GN=Mpo PE=2 SV=2 - [FERM_MOUSE]                                    | 81.1     | 718    | 37            | 28            | 52            | 39.00         | 1             | 1             | 4             | 2.00          | 4.2              | 0.028   |
| Q9ET01    | Glycogen phosphorylase, liver form OS=Mus musculus GN=Pyl PE=1 SV=4 - [PYGL_MOUSE]                 | 97.4     | 850    | 44            | 48            | 49            | 47.00         | 8             | 10            | 6             | 8.00          | 2.6              | 0.000   |
| P05201    | Aspartate aminotransferase, cytoplasmic OS=Mus musculus GN=Got1 PE=1 SV=3 - [AATC_MOUSE]           | 46.2     | 413    | 3             | 8             | 6             | 6.33          | 1             | 2             | 1             | 1.33          | 2.2              | 0.042   |
| Q9D154    | Leukocyte elastase inhibitor A OS=Mus musculus GN=Serp1b1a PE=1 SV=1 - [ILEUA_MOUSE]               | 42.5     | 379    | 67            | 65            | 65            | 65.67         | 18            | 11            | 14            | 14.50         | 2.2              | 0.000   |
| P30681    | High mobility group protein B2 OS=Mus musculus GN=Hmgb2 PE=1 SV=3 - [HMGb2_MOUSE]                  | 24.1     | 210    | 33            | 42            | 33            | 36.00         | 3             | 9             | 13            | 8.33          | 2.1              | 0.003   |
| E03034    | Plectin OS=Mus musculus GN=Plec PE=4 SV=1 - [E03034_MOUSE]                                         | 498.8    | 4386   | 9             | 9             | 9             | 9.00          | 1             | 1             | 5             | 2.33          | 1.9              | 0.007   |
| Q9R111    | Guanine deaminase OS=Mus musculus GN=Gda PE=1 SV=1 - [GUAD_MOUSE]                                  | 51.0     | 454    | 25            | 24            | 30            | 26.33         | 1             | 9             | 5             | 7.00          | 1.9              | 0.006   |
| O88593    | Peptidoglycan recognition protein 1 OS=Mus musculus GN=Pglyrp1 PE=2 SV=1 - [PGRP1_MOUSE]           | 20.5     | 182    | 18            | 16            | 22            | 18.67         | 4             | 6             | 5             | 5.00          | 1.9              | 0.011   |
| P14245    | Matrix metalloproteinase-9 OS=Mus musculus GN=Mmp9 PE=2 SV=2 - [MMP9_MOUSE]                        | 80.5     | 730    | 17            | 22            | 16            | 18.33         | 4             | 6             | 5             | 5.00          | 1.9              | 0.013   |
| P29351    | Tyrosine-protein phosphatase non-receptor type 6 OS=Mus musculus GN=Ptpn6 PE=1 SV=2 - [PTN6_MOUSE] | 67.5     | 595    | 7             | 4             | 7             | 6.00          | 1             | 3             | 1             | 1.67          | 1.8              | 0.023   |
| Q9QLH0    | Glutaredoxin-1 OS=Mus musculus GN=Grx1 PE=1 SV=3 - [GLRX1_MOUSE]                                   | 11.9     | 107    | 8             | 6             | 6             | 6.00          | 1             | 3             | 1             | 1.67          | 1.8              | 0.031   |
| D3Z2P2    | Chitinase-3-like protein 1 OS=Mus musculus GN=Ch3l1 PE=2 SV=1 - [D3Z2P2_MOUSE]                     | 42.8     | 389    | 19            | 16            | 14            | 16.33         | 4             | 4             | 6             | 4.67          | 1.8              | 0.002   |
| Q91298    | Chitinase-3-like protein 4 OS=Mus musculus GN=Ch3l4 PE=1 SV=2 - [CH3L4_MOUSE]                      | 44.9     | 402    | 19            | 19            | 20            | 19.33         | 1             | 15            | 1             | 5.67          | 1.8              | 0.043   |
| Q00612    | Glucose-6-phosphate 1-dehydrogenase X OS=Mus musculus GN=G6pdx PE=1 SV=3 - [G6PD1_MOUSE]           | 59.2     | 515    | 44            | 37            | 50            | 43.67         | 11            | 15            | 13            | 13.00         | 1.7              | 0.001   |
| Q3TRM9    | Hexokinase-3 OS=Mus musculus GN=Hk3 PE=1 SV=2 - [HXK3_MOUSE]                                       | 100.0    | 922    | 17            | 12            | 25            | 18.00         | 9             | 5             | 3             | 5.67          | 1.7              | 0.042   |
| P31786    | Acyl-CoA-binding protein OS=Mus musculus GN=Dbi PE=1 SV=2 - [ACBP_MOUSE]                           | 10.0     | 87     | 6             | 6             | 10            | 7.33          | 1             | 5             | 1             | 2.33          | 1.7              | 0.057   |
| Q91YR9    | Prostaglandin reductase 1 OS=Mus musculus GN=Ptar1 PE=2 SV=2 - [PTGR1_MOUSE]                       | 35.5     | 329    | 14            | 12            | 16            | 14.00         | 3             | 6             | 4             | 4.50          | 1.6              | 0.015   |
| A3KGJ5    | Spectrin alpha chain, non-erythrocytic 1 OS=Mus musculus GN=Splan1 PE=2 SV=1 - [A3KGJ5_MOUSE]      | 282.7    | 2457   | 10            | 7             | 6             | 7.67          | 2             | 3             | 2             | 2.50          | 1.6              | 0.048   |
| P01027    | Complement C3 OS=Mus musculus GN=C3 PE=1 SV=3 - [C03_MOUSE]                                        | 186.4    | 1683   | 27            | 17            | 26            | 23.33         | 5             | 11            | 7             | 7.67          | 1.6              | 0.013   |
| Q61166    | Microtubule-associated protein RPEB 1 OS=Mus musculus GN=Mapr1 PE=1 SV=3 - [MARE1_MOUSE]           | 30.0     | 288    | 7             | 7             | 10            | 8.00          | 1             | 1             | 6             | 2.67          | 1.6              | 0.052   |
| P24527    | Lactotriene A-4 hydrolase OS=Mus musculus GN=Lta4h PE=1 SV=4 - [LKHA4_MOUSE]                       | 69.0     | 611    | 51            | 54            | 68            | 57.67         | 15            | 22            | 21            | 19.33         | 1.6              | 0.003   |
| Q61646    | Haptoglobin OS=Mus musculus GN=Hp PE=1 SV=1 - [HPT_MOUSE]                                          | 38.7     | 347    | 22            | 19            | 23            | 21.33         | 6             | 9             | 7             | 7.50          | 1.5              | 0.005   |
| Q9CD00    | 6-phosphogluconate dehydrogenase, decarboxylating OS=Mus musculus GN=Pgd PE=2 SV=3 - [6PGD_MOUSE]  | 53.2     | 463    | 53            | 43            | 53            | 49.67         | 9             | 23            | 22            | 18.00         | 1.5              | 0.005   |
| P08071    | Lactotransferrin OS=Mus musculus GN=Ltf PE=2 SV=4 - [LTF_MOUSE]                                    | 77.8     | 707    | 126           | 128           | 129           | 127.33        | 22            | 58            | 75            | 51.67         | 1.3              | 0.008   |
| Q921M7    | Protein FAM49B OS=Mus musculus GN=Fam49b PE=2 SV=1 - [FAM49B_MOUSE]                                | 36.8     | 324    | 7             | 6             | 11            | 8.00          | 2             | 5             | 3             | 3.33          | 1.3              | 0.057   |
| Q92282    | Aspartate--iron ligase, cytoplasmic OS=Mus musculus GN=Dars PE=2 SV=2 - [SYDC_MOUSE]               | 57.1     | 501    | 3             | 4             | 5             | 4.00          | 1             | 1             | 3             | 1.67          | 1.3              | 0.057   |
| P06745    | Glucose-6-phosphate isomerase OS=Mus musculus GN=Gpi PE=1 SV=4 - [G6PI_MOUSE]                      | 62.7     | 558    | 74            | 76            | 76            | 75.33         | 27            | 31            | 38            | 32.00         | 1.2              | 0.000   |
| P10649    | Glutathione S-transferase Mu 1 OS=Mus musculus GN=Gstm1 PE=1 SV=2 - [GSTM1_MOUSE]                  | 26.0     | 218    | 27            | 22            | 28            | 25.67         | 8             | 11            | 14            | 11.00         | 1.2              | 0.004   |
| Q60865    | Caprin-1 OS=Mus musculus GN=Caprin1 PE=1 SV=2 - [CAPR1_MOUSE]                                      | 78.1     | 707    | 5             | 4             | 5             | 4.67          | 1             | 4             | 1             | 2.00          | 1.2              | 0.065   |
| P07356    | Annexin A2 OS=Mus musculus GN=Anxa2 PE=1 SV=2 - [ANXA2_MOUSE]                                      | 38.7     | 339    | 13            | 22            | 16            | 17.00         | 6             | 10            | 6             | 7.33          | 1.2              | 0.031   |
| Q9R0P5    | Dextrin OS=Mus musculus GN=Dstrn PE=1 SV=3 - [DEST_MOUSE]                                          | 18.5     | 165    | 6             | 8             | 10            | 8.00          | 3             | 4             | 3             | 3.50          | 1.2              | 0.061   |
| P05064    | Fructose-bisphosphate aldolase A OS=Mus musculus GN=Aldoa PE=1 SV=2 - [ALDOA_MOUSE]                | 39.3     | 364    | 21            | 33            | 33            | 29.00         | 11            | 15            | 13            | 13.00         | 1.2              | 0.018   |
| P41771    | Glutathione reductase, mitochondrial OS=Mus musculus GN=Gsr PE=2 SV=3 - [GSRH_MOUSE]               | 53.6     | 500    | 15            | 15            | 19            | 16.33         | 11            | 5             | 6             | 7.33          | 1.2              | 0.017   |
| Q9R1P1    | Proteasome subunit beta type-3 OS=Mus musculus GN=Pomb3 PE=1 SV=1 - [PSB3_MOUSE]                   | 22.9     | 205    | 10            | 9             | 11            | 10.00         | 5             | 5             | 4             | 4.67          | 1.1              | 0.001   |
| P52480    | Pyruvate kinase PKM OS=Mus musculus GN=Pkm PE=1 SV=4 - [KPYM_MOUSE]                                | 57.8     | 531    | 36            | 36            | 39            | 37.00         | 8             | 20            | 24            | 17.33         | 1.1              | 0.016   |
| P63028    | Translationally-controlled tumor protein OS=Mus musculus GN=Ttp1 PE=1 SV=1 - [TCTP_MOUSE]          | 19.4     | 172    | 14            | 19            | 16            | 16.33         | 6             | 7             | 10            | 7.67          | 1.1              | 0.010   |
| Q9Z0P5    | Twintin OS=Mus musculus GN=Tw2 PE=1 SV=1 - [TW2_MOUSE]                                             | 39.4     | 349    | 6             | 6             | 7             | 6.33          | 3             | 3             | 3             | 3.00          | 1.1              | 0.004   |
| Q81599    | Rho GDP-dissociation inhibitor 2 OS=Mus musculus GN=Rhgdib PE=1 SV=3 - [GDIR2_MOUSE]               | 22.8     | 200    | 31            | 39            | 35            | 35.00         | 11            | 21            | 19            | 17.00         | 1.0              | 0.009   |
| Q60864    | Stress-induced-phosphoprotein 1 OS=Mus musculus GN=Stip1 PE=1 SV=1 - [STIP1_MOUSE]                 | 62.5     | 543    | 9             | 8             | 10            | 9.00          | 4             | 5             | 4             | 4.50          | 1.0              | 0.012   |
| P13020    | Gelsolin OS=Mus musculus GN=Gsn PE=1 SV=3 - [GELS_MOUSE]                                           | 85.9     | 780    | 10            | 9             | 11            | 10.00         | 6             | 4             | 5             | 5.00          | 1.0              | 0.018   |
| G3UUV4    | Hexokinase 1, isoform CRA 1 OS=Mus musculus GN=Hk1 PE=3 SV=1 - [IG3UUV4_MOUSE]                     | 101.8    | 917    | 6             | 7             | 8             | 7.00          | 3             | 4             | 1             | 3.50          | 1.0              | 0.025   |
| P11672    | Neutrophil gelatinase-associated lipocalin OS=Mus musculus GN=Ng2 PE=1 SV=1 - [NGAL_MOUSE]         | 22.9     | 200    | 26            | 20            | 20            | 22.00         | 5             | 13            | 15            | 11.00         | 1.0              | 0.160   |
| Q9UKF1    | Ras GTPase-activating-like protein IQGAP1 OS=Mus musculus GN=Iqgap1 PE=1 SV=2 - [IQGA1_MOUSE]      | 188.6    | 1657   | 24            | 22            | 31            | 25.67         | 9             | 17            | 13            | 13.00         | 1.0              | 0.024   |
| P40142    | Transketolase OS=Mus musculus GN=Tkt PE=1 SV=1 - [TKT_MOUSE]                                       | 67.6     | 623    | 85            | 86            | 93            | 88.00         | 34            | 53            | 49            | 45.33         | 1.0              | 0.002   |
| O89053    | Coronin-1A OS=Mus musculus GN=Coro1a PE=1 SV=5 - [COR1A_MOUSE]                                     | 51.0     | 461    | 36            | 35            | 31            | 34.00         | 14            | 17            | 22            | 17.67         | 0.9              | 0.004   |
| B7FAU9    | Filamin, alpha OS=Mus musculus GN=Flna PE=4 SV=1 - [B7FAU9_MOUSE]                                  | 280.3    | 2639   | 96            | 93            | 98            | 95.67         | 28            | 58            | 65            | 50.33         | 0.9              | 0.017   |
| P08805    | Uryozyme C-2 OS=Mus musculus GN=Lyz2 PE=1 SV=2 - [LYZ2_MOUSE]                                      | 16.7     | 148    | 20            | 18            | 25            | 21.00         | 11            | 11            | 13            | 11.67         | 0.8              | 0.013   |
| Q9DBJ1    | Phosphoglycerate mutase 1 OS=Mus musculus GN=Pgam1 PE=1 SV=3 - [PGAM1_MOUSE]                       | 28.8     | 254    | 28            | 39            | 32            | 33.00         | 14            | 18            | 23            | 18.33         | 0.8              | 0.024   |
| P10810    | Monocyte differentiation antigen CD14 OS=Mus musculus GN=Cd14 PE=1 SV=1 - [CD14_MOUSE]             | 39.2     | 366    | 10            | 10            | 14            | 11.33         | 6             | 7             | 6             | 6.33          | 0.8              | 0.022   |
| P31725    | Protein S100-A9 OS=Mus musculus GN=S100a9 PE=1 SV=3 - [S100A9_MOUSE]                               | 13.0     | 113    | 44            | 32            | 31            | 35.67         | 14            | 25            | 21            | 20.00         | 0.8              | 0.041   |
| P14211    | Calreticulin OS=Mus musculus GN=Calr PE=1 SV=1 - [CALR_MOUSE]                                      | 48.0     | 416    | 21            | 28            | 27            | 25.33         | 20            | 10            | 13            | 14.33         | 0.8              | 0.040   |
| Q9CC60    | 6-phosphogluconolactonase OS=Mus musculus GN=Pgl6 PE=2 SV=1 - [6PGL_MOUSE]                         | 27.2     | 257    | 15            | 14            | 14            | 14.33         | 6             | 11            | 8             | 8.33          | 0.8              | 0.016   |
| Q9CR16    | Peptidyl-prolyl cis-trans isomerase D OS=Mus musculus GN=Ppid PE=1 SV=2 - [PPID_MOUSE]             | 40.7     | 370    | 5             | 6             | 7             | 6.00          | 3             | 4             | 3             | 3.50          | 0.8              | 0.058   |
| Q9CVC6    | Actin-related protein 2/3 complex subunit 2 OS=Mus musculus GN=Arpc2 PE=1 SV=3 - [ARPC2_MOUSE]     | 34.3     | 300    | 29            | 24            | 27            | 26.67         | 14            | 22            | 11            | 15.67         | 0.8              | 0.038   |
| Q00519    | Xanthine dehydrogenase/oxidase OS=Mus musculus GN=Xdh PE=1 SV=5 - [XDH_MOUSE]                      | 146.5    | 1335   | 17            | 16            | 16            | 16.33         | 15            | 8             | 7             | 10.00         | 0.7              | 0.067   |
| Q91WV3    | SH3 domain-binding glutamic protein 3 OS=Mus musculus GN=Sh3bgl3 PE=1 SV=1 - [SH3L3_MOUSE]         | 10.5     | 93     | 6             | 7             | 8             | 7.00          | 3             | 5             | 5             | 4.33          | 0.7              | 0.039   |
| P17742    | Peptidyl-prolyl cis-trans isomerase A OS=Mus musculus GN=Ppia PE=1 SV=2 - [PIPA_MOUSE]             | 18.0     | 164    | 33            | 31            | 34            | 32.67         | 22            | 17            | 22            | 20.33         | 0.7              | 0.003   |
| P27005    | Protein S100-A8 OS=Mus musculus GN=S100a8 PE=1 SV=3 - [S100A8_MOUSE]                               | 10.3     | 89     | 77            | 89            | 84            | 83.33         | 32            | 71            | 57            | 53.33         | 0.6              | 0.066   |
| P68254    | 14-3-3 protein theta OS=Mus musculus GN=Yhaa PE=1 SV=1 - [1433T_MOUSE]                             | 27.8     | 245    | 15            | 13            | 17            | 15.00         | 11            | 9             | 9             | 9.67          | 0.6              | 0.016   |
| P69307    | Ubiquitin-conjugating enzyme E2-1.3 OS=Mus musculus GN=Ube2p1 PE=2 SV=1 - [UB2L3_MOUSE]            | 17.9     | 154    | 6             | 5             | 6             | 5.67          | 3             | 5             | 3             | 3.67          | 0.6              | 0.055   |
| H7BW23    | Actin-related protein 2/3 complex subunit 3 OS=Mus musculus GN=Arpc3 PE=2 SV=1 - [H7BW23_MOUSE]    | 19.6     | 170    | 7             | 8             | 8             | 7.67          | 6             | 5             | 4             | 5.00          | 0.6              | 0.016   |
| O35744    | Chitinase-3-like protein 3 OS=Mus musculus GN=Ch3l3 PE=1 SV=2 - [CH3L3_MOUSE]                      | 44.4     | 398    | 62            | 59            | 68            | 63.00         | 33            | 42            | 50            | 41.67         | 0.6              | 0.019   |
| P17182    | Alpha-enolase OS=Mus musculus GN=Eno1 PE=1 SV=3 - [ENOA_MOUSE]                                     | 47.1     | 434    | 56            | 44            | 48            | 49.33         | 27            | 33            | 38            | 32.67         | 0.6              | 0.025   |
| P16110    | Galectin-3 OS=Mus musculus GN=Lgals3 PE=1 SV=3 - [LEG3_MOUSE]                                      | 27.5     | 264    | 27            | 24            | 23            | 24.67         | 10            | 20            | 19            | 16.33         | 0.6              | 0.070   |

**Supplementary Table 1 - Summary of identified proteins from secretomics analysis of H-SCM and D-SCM.** List of 144 protein matches identified as secreted proteins (115 identified in both D-SCM and H-SCM and 29 identified exclusively in D-SCM), with significance cut-off of  $p < 0.1$ . Matched proteins highlighted in green have peptide spectral matches with a log2 fold difference greater than 1.5 in D-SCM. Matched proteins highlighted in red have peptide spectral matches with a log2 fold difference greater than 1.5 in H-SCM.

| Accession | Description                                                                                    | MW [kDa] | Length | #PSM - D-SCM 1 | #PSM - D-SCM 2 | #PSM - D-SCM 3 | Average D-SCM | #PSM - H-SCM 1 | #PSM - H-SCM 2 | #PSM - H-SCM 3 | Average H-SCM | Log 2 Fold Change | P-Value |
|-----------|------------------------------------------------------------------------------------------------|----------|--------|----------------|----------------|----------------|---------------|----------------|----------------|----------------|---------------|-------------------|---------|
| P07901    | Heat shock protein HSP 90-alpha OS=Mus musculus GN=Hsp90aa1 PE=1 SV=4 - [HSP90A_MOUSE]         | 84.7     | 733    | 44             | 49             | 57             | 50.00         | 28             | 38             | 36             | 34.00         | 0.6               | 0.030   |
| O08692    | Myeloid lactacinin (F1) OS=Mus musculus GN=Npg PE=2 SV=1 - [O08692_MOUSE]                      | 19.3     | 167    | 22             | 21             | 23             | 22.00         | 11             | 16             | 18             | 15.00         | 0.6               | 0.032   |
| P27773    | Protein disulfide-isomerase K3 OS=Mus musculus GN=Plia3 PE=1 SV=2 - [PDIA3_MOUSE]              | 56.6     | 595    | 43             | 53             | 52             | 49.33         | 30             | 37             | 36             | 34.33         | 0.5               | 0.018   |
| P26040    | Ezrin OS=Mus musculus GN=Ezr PE=1 SV=3 - [EZRI_MOUSE]                                          | 69.4     | 586    | 19             |                | 20             | 19.50         | 14             | 14             |                | 14.00         | 0.5               | 0.008   |
| Q61233    | Plastin-2 OS=Mus musculus GN=Lop1 PE=1 SV=4 - [PLSL_MOUSE]                                     | 70.1     | 627    | 106            | 91             | 118            | 105.00        | 81             | 81             | 77             | 79.67         | 0.4               | 0.033   |
| P63101    | 14-3-3 protein zeta/delta OS=Mus musculus GN=Ywhaz PE=1 SV=1 - [1433Z_MOUSE]                   | 27.8     | 245    | 40             | 40             | 36             | 36.67         | 30             | 33             | 30             | 31.00         | 0.3               | 0.010   |
| P20029    | 78 kDa glucose-regulated protein OS=Mus musculus GN=Hspa5 PE=1 SV=3 - [GRP78_MOUSE]            | 72.4     | 655    | 46             | 47             | 52             | 49.00         | 36             | 44             | 44             | 41.33         | 0.2               | 0.067   |
| P27661    | Histone H2AX OS=Mus musculus GN=H2afx PE=1 SV=2 - [H2AX_MOUSE]                                 | 15.1     | 143    | 16             | 16             |                | 16.33         | 7              | 19             | 19             | 19.00         | -0.2              | 0.008   |
| P08228    | Superoxide dismutase [Cu-Zn] OS=Mus musculus GN=Sod1 PE=1 SV=2 - [SODC_MOUSE]                  | 15.9     | 154    | 13             | 12             | 14             | 13.00         | 18             | 15             | 15             | 16.00         | -0.3              | 0.060   |
| P08249    | Malate dehydrogenase, mitochondrial OS=Mus musculus GN=Mdh2 PE=1 SV=3 - [MDHM_MOUSE]           | 35.6     | 338    | 18             | 18             | 19             | 18.33         | 22             | 24             | 23             | 23.00         | -0.3              | 0.002   |
| P68372    | Tubulin beta-4B chain OS=Mus musculus GN=Tuub4b PE=1 SV=1 - [TBB4B_MOUSE]                      | 49.8     | 445    | 25             | 19             |                | 22.00         | 34             | 33             | 29             | 32.00         | -0.5              | 0.044   |
| Q61029    | Lamina-associated polypeptide 2 OS=Mus musculus GN=Lmpo PE=1 SV=4 - [LAP2B_MOUSE]              | 50.3     | 452    | 8              | 8              | 9              | 8.67          | 10             | 14             | 14             | 12.67         | -0.5              | 0.044   |
| P43275    | Histone H1.1 OS=Mus musculus GN=H1t1a PE=1 SV=2 - [H11_MOUSE]                                  | 21.8     | 213    | 8              | 8              | 8              | 8.00          | 11             | 13             | 12             | 12.00         | -0.6              | 0.113   |
| A1BN54    | Alpha actinin 1a OS=Mus musculus GN=Acln1 PE=2 SV=1 - [A1BN54_MOUSE]                           | 102.7    | 887    | 52             | 50             | 68             | 56.67         | 79             | 85             | 91             | 85.00         | -0.6              | 0.013   |
| Q8VC10    | Phospholipase B-like 1 OS=Mus musculus GN=Plbd1 PE=1 SV=1 - [PLBL1_MOUSE]                      | 63.0     | 550    | 13             | 15             | 13             | 13.67         | 21             | 26             | 17             | 21.33         | -0.6              | 0.046   |
| A6DUK4    | Beta-globin OS=Mus musculus GN=Hbb-b1 PE=3 SV=1 - [A6DUK4_MOUSE]                               | 15.7     | 147    | 39             | 36             | 50             | 41.67         | 70             | 69             | 60             | 66.33         | -0.7              | 0.010   |
| Q8DCJ6    | N-acetylneuraminylase OS=Mus musculus GN=Npl PE=1 SV=1 - [NPL_MOUSE]                           | 35.1     | 320    | 7              | 6              | 5              | 6.00          | 9              | 13             | 10             | 10.67         | -0.8              | 0.025   |
| P47754    | F-actin-capping protein subunit alpha-2 OS=Mus musculus GN=Capz2 PE=1 SV=3 - [CAZ2_MOUSE]      | 32.9     | 286    | 3              | 3              | 4              | 3.33          | 6              | 5              | 7              | 6.00          | -0.8              | 0.016   |
| Q9Z2X1    | Heterogeneous nuclear ribonucleoprotein F OS=Mus musculus GN=Hnmpf PE=1 SV=3 - [HNRF_MOUSE]    | 45.7     | 415    | 5              | 7              | 4              | 5.33          | 8              | 10             | 11             | 9.67          | -0.9              | 0.025   |
| Q9JI16    | Alcohol dehydrogenase [NADP+] OS=Mus musculus GN=Akr1a1 PE=1 SV=3 - [AKIA1_MOUSE]              | 36.6     | 325    | 7              | 4              | 7              | 6.00          | 10             | 14             | 9              | 11.00         | -0.9              | 0.052   |
| P14152    | Malate dehydrogenase, cytoplasmic OS=Mus musculus GN=Mdh1 PE=1 SV=3 - [MDHC_MOUSE]             | 36.5     | 334    | 6              | 5              | 8              | 6.33          | 10             | 12             | 13             | 11.67         | -0.9              | 0.013   |
| P28076    | Proteasome subunit beta type-9 OS=Mus musculus GN=Pemb9 PE=1 SV=1 - [PSB9_MOUSE]               | 23.4     | 219    | 4              |                | 3              | 3.50          | 6              | 7              |                | 6.50          | -0.9              | 0.051   |
| Q99L70    | Protein dpy-30 homolog OS=Mus musculus GN=Dpy30 PE=1 SV=1 - [DPY30_MOUSE]                      | 11.2     | 99     | 4              | 4              | 5              | 4.33          | 8              | 9              | 8              | 8.33          | -0.9              | 0.001   |
| P35700    | Peroxiredoxin-1 OS=Mus musculus GN=Prdx1 PE=1 SV=1 - [PRDX1_MOUSE]                             | 22.2     | 199    | 13             | 13             | 16             | 14.00         | 29             | 25             | 27             | 27.00         | -0.9              | 0.001   |
| Q8R257    | Heme-binding protein 1 OS=Mus musculus GN=Hbgl PE=1 SV=2 - [HEBP1_MOUSE]                       | 21.1     | 190    | 7              | 6              | 8              | 7.00          | 11             | 14             | 17             | 14.00         | -1.0              | 0.019   |
| P18242    | Cathepsin D OS=Mus musculus GN=Ctsd PE=1 SV=1 - [CATD_MOUSE]                                   | 44.9     | 410    | 17             | 10             | 12             | 13.00         | 32             | 24             | 23             | 26.33         | -1.0              | 0.019   |
| P14733    | Lamin-B1 OS=Mus musculus GN=Lmb1 PE=1 SV=3 - [LMB1_MOUSE]                                      | 66.7     | 588    | 10             | 21             | 16             | 15.67         | 23             | 36             | 38             | 32.33         | -1.0              | 0.043   |
| O88844    | Isocitrate dehydrogenase [NADP] cytoplasmic OS=Mus musculus GN=Idh1 PE=1 SV=2 - [IDHC_MOUSE]   | 46.6     | 414    | 6              | 5              | 4              | 5.00          | 11             | 13             | 9              | 11.00         | -1.1              | 0.010   |
| Q8BC07    | Phospholipase D4 OS=Mus musculus GN=Plk4 PE=2 SV=1 - [PLD4_MOUSE]                              | 56.1     | 503    | 14             | 12             | 8              | 11.33         | 29             | 24             | 25             | 26.00         | -1.2              | 0.003   |
| P29418    | Beta-hexosaminidase subunit alpha OS=Mus musculus GN=Hexa PE=2 SV=2 - [HEXA_MOUSE]             | 80.6     | 528    | 7              |                | 6              | 6.50          | 14             | 16             | 15             | 15.00         | -1.2              | 0.002   |
| H3BK00    | AP-2 complex subunit beta OS=Mus musculus GN=A2b1 PE=2 SV=1 - [H3BK00_MOUSE]                   | 101.3    | 913    | 5              | 2              | 5              | 4.00          | 12             | 9              | 7              | 9.33          | -1.2              | 0.039   |
| Q923D2    | Flavin reductase (NADPH) OS=Mus musculus GN=Bnrb PE=2 SV=3 - [BLVRB_MOUSE]                     | 22.2     | 206    | 8              | 6              | 8              | 7.33          | 21             | 19             | 16             | 18.67         | -1.3              | 0.002   |
| P21619    | Lamin-B2 OS=Mus musculus GN=Lmb2 PE=1 SV=2 - [LMB2_MOUSE]                                      | 67.3     | 596    | 4              | 3              | 3              | 3.50          | 8              | 10             | 9              | 9.00          | -1.4              | 0.039   |
| P14901    | Heme oxygenase 1 OS=Mus musculus GN=Hmox1 PE=1 SV=1 - [HMOX1_MOUSE]                            | 32.9     | 289    | 9              | 10             | 9              | 9.33          | 23             | 26             | 25             | 24.67         | -1.4              | 0.000   |
| P20060    | Beta-hexosaminidase subunit beta OS=Mus musculus GN=Hexb PE=2 SV=2 - [HEXB_MOUSE]              | 61.1     | 536    | 3              | 7              | 6              | 5.33          | 15             | 14             | 14             | 14.33         | -1.4              | 0.002   |
| Q8CPX4    | Ferritin OS=Mus musculus GN=Fth1 PE=2 SV=1 - [Q8CPX4_MOUSE]                                    | 20.8     | 183    | 32             | 32             | 31             | 31.67         | 96             | 107            | 58             | 87.00         | -1.5              | 0.020   |
| P09528    | Ferritin heavy chain OS=Mus musculus GN=Fth1 PE=1 SV=2 - [FRH_MOUSE]                           | 21.1     | 182    | 14             | 18             | 12             | 14.67         | 38             | 40             | 43             | 40.33         | -1.5              | 0.000   |
| Q9QZ08    | Core histone macro-H2A.1 OS=Mus musculus GN=H2afy PE=1 SV=3 - [H2AY_MOUSE]                     | 39.7     | 372    | 4              | 6              | 4              | 4.67          | 14             | 16             | 15             | 15.00         | -1.7              | 0.003   |
| P18675    | Lysosomal protective protein OS=Mus musculus GN=Lpp PE=1 SV=1 - [LPPB_MOUSE]                   | 53.8     | 474    | 4              | 4              |                | 4.00          | 14             | 14             | 12             | 13.33         | -1.7              | 0.002   |
| P99024    | Tubulin beta-5 chain OS=Mus musculus GN=Tuub5 PE=1 SV=1 - [TBB5_MOUSE]                         | 49.6     | 444    | 1              | 1              | 28             | 10.00         | 34             | 35             | 33             | 34.00         | -1.8              | 0.056   |
| Q8R1G2    | Carboxymethylerythrinolase homolog OS=Mus musculus GN=Cmb1 PE=2 SV=1 - [CMBL_MOUSE]            | 27.9     | 245    | 3              | 1              | 1              | 1.67          | 6              | 7              | 6              | 6.33          | -1.9              | 0.003   |
| P10605    | Cathepsin B OS=Mus musculus GN=Ctsb PE=1 SV=2 - [CATB_MOUSE]                                   | 37.3     | 339    | 11             | 7              | 10             | 9.33          | 43             | 35             | 35             | 37.67         | -2.0              | 0.001   |
| Q8CY64    | Biliverdin reductase A OS=Mus musculus GN=Blvra PE=2 SV=1 - [BIEA_MOUSE]                       | 33.5     | 295    | 4              | 3              | 3              | 3.33          | 17             | 12             | 13             | 14.00         | -2.1              | 0.002   |
| Q9QZL3    | Platelet glycoprotein V (Fragment) OS=Mus musculus GN=Op5 PE=2 SV=1 - [Q9QZL3_MOUSE]           | 83.3     | 567    | 4              | 1              | 1              | 2.00          | 12             | 7              | 7              | 8.67          | -2.1              | 0.027   |
| P36552    | Coproporphyrinogen-III oxidase, mitochondrial OS=Mus musculus GN=Cpox PE=1 SV=2 - [HEM6_MOUSE] | 49.7     | 443    | 6              | 3              | 5              | 4.67          | 18             | 25             | 24             | 22.33         | -2.3              | 0.002   |
| Q9QWR8    | Alpha-N-acetylglucosaminidase OS=Mus musculus GN=Naga PE=2 SV=2 - [INAGAB_MOUSE]               | 47.2     | 415    | 4              | 4              | 1              | 3.00          | 18             | 18             | 18             | 18.00         | -2.6              | 0.000   |
| Q9WV54    | Acid ceramidase OS=Mus musculus GN=Asah1 PE=1 SV=1 - [JASAH1_MOUSE]                            | 44.6     | 394    | 6              | 1              | 1              | 2.67          | 19             | 17             | 13             | 16.33         | -2.6              | 0.005   |
| P15508    | Spectrin beta chain, erythrocyte OS=Mus musculus GN=Sptb PE=1 SV=4 - [SPTB_MOUSE]              | 245.1    | 2128   | 1              | 1              | 3              | 1.67          | 7              | 11             | 14             | 10.67         | -2.7              | 0.014   |
| P35441    | Thrombospondin-1 OS=Mus musculus GN=Thbs1 PE=1 SV=1 - [TSP1_MOUSE]                             | 129.6    | 1170   | 3              | 2              | 2              | 2.50          | 11             | 16             | 25             | 17.33         | -2.8              | 0.068   |
| Q62351    | Transferrin receptor protein 1 OS=Mus musculus GN=Tfrc PE=1 SV=1 - [TFR1_MOUSE]                | 85.7     | 763    | 4              | 1              | 1              | 2.00          | 6              | 20             | 24             | 16.67         | -3.1              | 0.057   |
| P48678    | Prelamin-A/C OS=Mus musculus GN=Lmna PE=1 SV=2 - [LMNA_MOUSE]                                  | 74.2     | 665    | 1              | 1              | 4              | 2.00          | 19             | 28             | 39             | 26.67         | -3.8              | 0.010   |

## Supplementary Table 1, Continued

Continuation of 115 secreted proteins identified in both H-SCM and D-SCM.

| Accession | Description                                                                                               | MW [kDa] | #PSM - D-SCM 1 | #PSM - D-SCM 2 | #PSM - D-SCM 3 | Average D-SCM |
|-----------|-----------------------------------------------------------------------------------------------------------|----------|----------------|----------------|----------------|---------------|
| P00688    | Pancreatic alpha-amylase OS=Mus musculus GN=Amy2 PE=1 SV=2 - [AMYP_MOUSE]                                 | 57.3     | 75             | 24             | 26             | 41.67         |
| P08032    | Spectrin alpha chain, erythrocytic 1 OS=Mus musculus GN=Spta1 PE=2 SV=3 - [SPTA1_MOUSE]                   | 279.7    | 9              | 18             | 18             | 15.00         |
| P00687    | Alpha-amylase 1 OS=Mus musculus GN=Amy1 PE=1 SV=2 - [AMY1_MOUSE]                                          | 57.6     | 49             | 18             | 16             | 27.67         |
| P63038    | 60 kDa heat shock protein, mitochondrial OS=Mus musculus GN=Hspd1 PE=1 SV=1 - [CH60_MOUSE]                | 60.9     | 5              | 12             | 12             | 9.67          |
| Q35405    | Phospholipase D3 OS=Mus musculus GN=Pld3 PE=2 SV=1 - [PLD3_MOUSE]                                         | 54.4     | 14             | 12             | 11             | 12.33         |
| P01899    | H-2 class I histocompatibility antigen, D-B alpha chain OS=Mus musculus GN=H2-D1 PE=1 SV=2 - [HA11_MOUSE] | 40.8     | 4              | 6              | 10             | 6.67          |
| P21981    | Protein-glutamine gamma-glutamyltransferase 2 OS=Mus musculus GN=Tgm2 PE=1 SV=4 - [TGM2_MOUSE]            | 77.0     | 10             | 8              | 9              | 9.00          |
| Q9EQI5    | Chemokine (C-X-C motif) ligand 7, isoform CRA_b OS=Mus musculus GN=Ppbb PE=4 SV=1 - [Q9EQI5_MOUSE]        | 12.2     | 6              | 5              | 9              | 6.67          |
| Q9WVJ3    | Carboxypeptidase Q OS=Mus musculus GN=Cpq PE=2 SV=1 - [CBPQ_MOUSE]                                        | 51.8     | 10             | 10             | 8              | 9.33          |
| P05208    | Chymotrypsin-like elastase family member 2A OS=Mus musculus GN=Cela2a PE=2 SV=1 - [CEL2A_MOUSE]           | 28.9     | 28             | 7              | 8              | 14.33         |
| Q05117    | Tartrate-resistant acid phosphatase type 5 OS=Mus musculus GN=Acp5 PE=2 SV=2 - [PPA5_MOUSE]               | 36.8     | 6              | 7              | 8              | 7.00          |
| G5E850    | Cytochrome b-5, isoform CRA_a OS=Mus musculus GN=Cyb5 PE=3 SV=1 - [G5E850_MOUSE]                          | 11.1     | 4              | 3              | 7              | 4.67          |
| Q9D1A2    | Cytosolic non-specific dipeptidase OS=Mus musculus GN=Cndp2 PE=1 SV=1 - [CNDP2_MOUSE]                     | 52.7     | 3              | 9              | 6              | 6.00          |
| P45376    | Aldose reductase OS=Mus musculus GN=Akr1b1 PE=1 SV=3 - [ALDR_MOUSE]                                       | 35.7     | 5              | 7              | 6              | 6.00          |
| Q9R0T7    | MCG15085 OS=Mus musculus GN=Try4 PE=2 SV=1 - [Q9R0T7_MOUSE]                                               | 26.3     | 11             | 6              | 6              | 7.67          |
| Q7TPZ8    | Carboxypeptidase A1 OS=Mus musculus GN=Cpa1 PE=2 SV=1 - [CBPA1_MOUSE]                                     | 47.4     | 33             | 5              | 6              | 14.67         |
| Q91X79    | Chymotrypsin-like elastase family member 1 OS=Mus musculus GN=Cela1 PE=2 SV=1 - [CELA1_MOUSE]             | 28.9     | 29             | 4              | 6              | 13.00         |
| P48036    | Annexin A5 OS=Mus musculus GN=Anxa5 PE=1 SV=1 - [ANXA5_MOUSE]                                             | 35.7     | 12             | 9              | 5              | 8.67          |
| O89023    | Tripeptidyl-peptidase 1 OS=Mus musculus GN=Thpp1 PE=1 SV=2 - [THPP1_MOUSE]                                | 61.3     | 6              | 6              | 5              | 5.67          |
| Q04447    | Creatine kinase B-type OS=Mus musculus GN=Ckb PE=1 SV=1 - [KCRB_MOUSE]                                    | 42.7     | 6              | 5              | 5              | 5.33          |
| P04117    | Fatty acid-binding protein, adipocyte OS=Mus musculus GN=Fabp4 PE=1 SV=3 - [FABP4_MOUSE]                  | 14.6     | 3              | 6              | 4              | 4.33          |
| P13707    | Glycerol-3-phosphate dehydrogenase [NAD(+)], cytoplasmic OS=Mus musculus GN=Gpd1 PE=1 SV=3 - [GPDA_MOUSE] | 37.5     | 6              | 4              | 4              | 4.67          |
| P49935    | Pro-cathepsin H OS=Mus musculus GN=Ctsh PE=2 SV=2 - [CATH_MOUSE]                                          | 37.1     | 5              | 4              | 4              | 4.33          |
| P56391    | Cytochrome c oxidase subunit 6B1 OS=Mus musculus GN=Cox6b1 PE=1 SV=2 - [CX6B1_MOUSE]                      | 10.1     | 4              | 4              | 4              | 4.00          |
| D3Z7R1    | Pyridoxal kinase OS=Mus musculus GN=Pdkx PE=2 SV=1 - [D3Z7R1_MOUSE]                                       | 30.2     | 4              | 4              | 4              | 4.00          |
| Q61830    | Macrophage mannose receptor 1 OS=Mus musculus GN=Mrc1 PE=1 SV=2 - [MRC1_MOUSE]                            | 164.9    | 7              | 8              | 3              | 6.00          |
| O35215    | D-dopachrome decarboxylase OS=Mus musculus GN=Ddt PE=1 SV=3 - [DOPD_MOUSE]                                | 13.1     | 6              | 4              | 3              | 4.33          |
| O88958    | Glucosamine-6-phosphate isomerase 1 OS=Mus musculus GN=Gnpd1 PE=2 SV=3 - [GNPI1_MOUSE]                    | 32.5     | 4              | 4              | 3              | 3.67          |
| Q3TCN2    | Putative phospholipase B-like 2 OS=Mus musculus GN=Plb2 PE=1 SV=2 - [PLBL2_MOUSE]                         | 66.2     | 9              | 3              | 3              | 5.00          |

## Supplementary Table 1, Continued

List of 29 secreted factors identified exclusively in D-SCM.

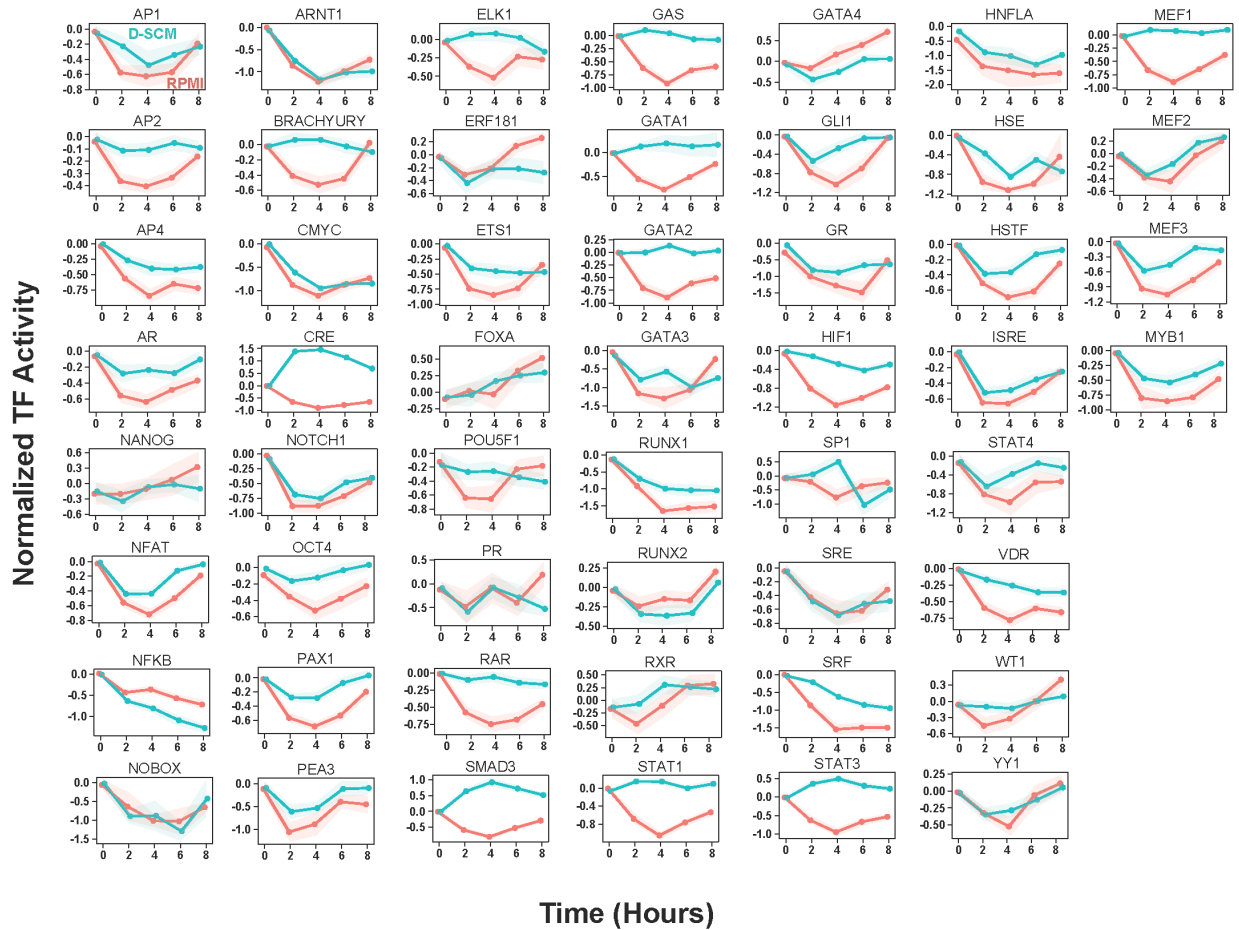

**Supplementary Figure 2 – TF activity of MDA-MB-231 cells measured cultured in D-SCM using TRACER.** TRACER line-plot data showing 52 TF reporter activity profiles for MDA-MB-231 cells cultured in D-SCM or RPMI over an 8 hour period normalized to control TA-FLuc activity. Red line plots = RPMI, blue line plots = D-SCM ( $n = 6$  arrays).

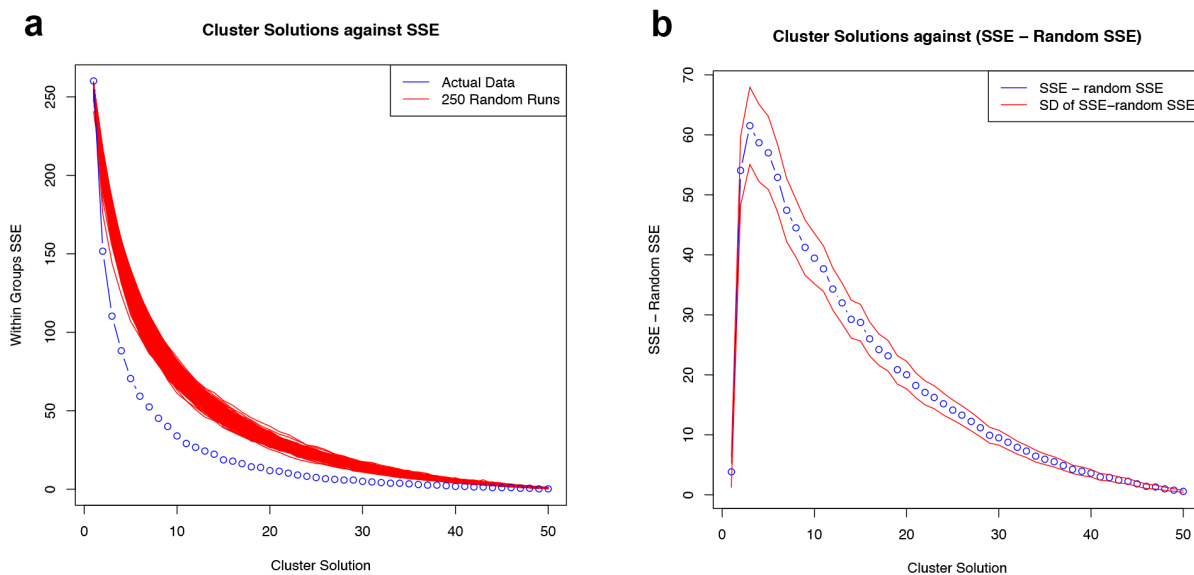

**Supplementary Figure 3 - *K*-cluster analysis of MDA-MB-231 TRACER activity in D-SCM.**

**(a)** Cluster solutions against sum of squared errors compared to 250 random data set runs. **(b)**

Absolute difference between actual and random (mean of all runs) SSE against cluster solutions.

| Cluster | Reporter | TF Name                                            | Category                    | Associated GO Processes                                 |
|---------|----------|----------------------------------------------------|-----------------------------|---------------------------------------------------------|
| 1       | CRE      | cAMP Response Element Binding Protein 1            | Canonical Pathways          | cAMP response, cell proliferation, migration, invasion  |
| 1       | STAT3    | Signal Transducer and Activator of Transcription 3 | Inflammatory Response       | Acute phase response, proliferation, cytokine response  |
| 1       | SMAD3    | Smad3                                              | Canonical Pathways          | TGF $\beta$ pathway response, cell cycle, cell invasion |
| 1       | STAT1    | Signal Transducer and Activator of Transcription 1 | Inflammatory Response       | Interferon response, proliferation, cytokine response   |
| 1       | SRF      | Serum Response Factor                              | Canonical Pathways          | MAPK pathway, cell cycle, growth, migration, apoptosis  |
| 1       | MEF1     | Myocyte-specific enhancer factor 1                 | Differentiation/Development | Mesodermal differentiation, cell adhesion               |
| 1       | HIF1     | Hypoxia Inducible Factor 1A                        | Differentiation/Development | Hypoxia response, angiogenesis                          |
| 1       | GATA2    | Gata binding protein 2                             | Differentiation/Development | Endothelial; adipocyte differentiation, angiogenesis    |
| 1       | GATA1    | Gata binding protein 1                             | Differentiation/Development | Hematopoietic differentiation                           |
| 1       | GAS      | Interferon-Gamma Activated Sequence                | Inflammatory Response       | STAT family promoter                                    |

**Supplementary Table 2 - List of significantly active transcription factor reporters in Cluster 1 of D-SCM TRACER screen.** TFs are listed by TF reporter category and associated gene ontology (GO) processes. Sources: TRANSFAC, MetaCore, NCBI databases.



| Secreted Factor        | Downstream Receptor(s) | Downstream TFs                                                                     |
|------------------------|------------------------|------------------------------------------------------------------------------------|
| Calgranulin A (S100a8) | TLR4<br>RAGE           | cJun<br>GATA1<br>GATA4<br>HIF1A<br>HSF1<br>IRF3<br>RUNX1<br>RXR<br>SMAD3<br>VDR    |
| Calgranulin B (S100a9) | RAGE                   | cJun<br>GATA1<br>GATA4<br>HIF1A<br>HSF1<br>RUNX1<br>RXR<br>SMAD3<br>VDR            |
| Haptoglobin            | CCR2                   | AR<br>HIF1A<br>IRF3<br>MafB<br>p73<br>RAR<br>SMAD3<br>SRF<br>STAT1<br>STAT3<br>VDR |
| Heme Binding Protein   | FPR<br>FPRL1           | cFos<br>cMyc<br>ENO1<br>SMAD3<br>STAT1<br>SRF<br>STAT3<br>STAT5                    |
| Myeloperoxidase        | $\alpha_M\beta_2$      | AR<br>HIF1A<br>IRF3<br>MafB<br>p73<br>RAR<br>SMAD3<br>VDR                          |

**Supplementary Table 3 - List of curated interactions.** Interactions between candidate secreted factors, downstream receptors, and downstream TFs identified using MetaCore are catalogued.

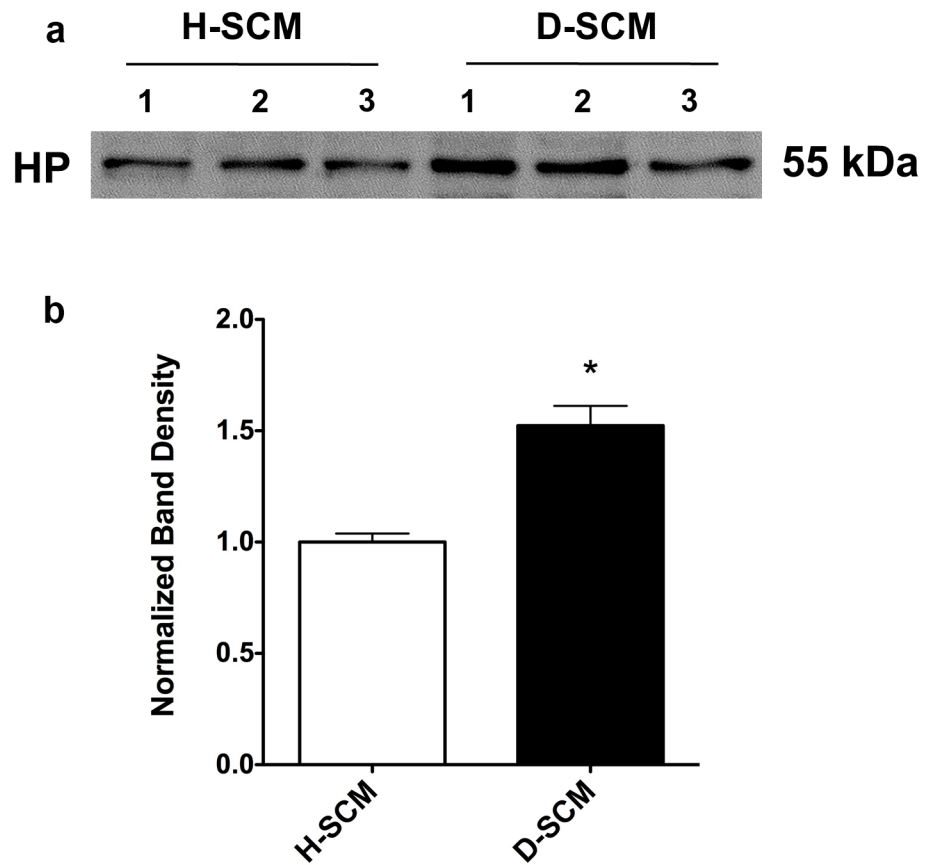

**Supplementary Figure 4 – Validation of haptoglobin abundance in H-SCM and D-SCM. (a)** Western blot of H-SCM and D-SCM samples in triplicate showing Hp bands. **(b)** Corresponding normalized band density quantification ( $n = 3$ ,  $* p < 0.006$  compared to H-SCM).

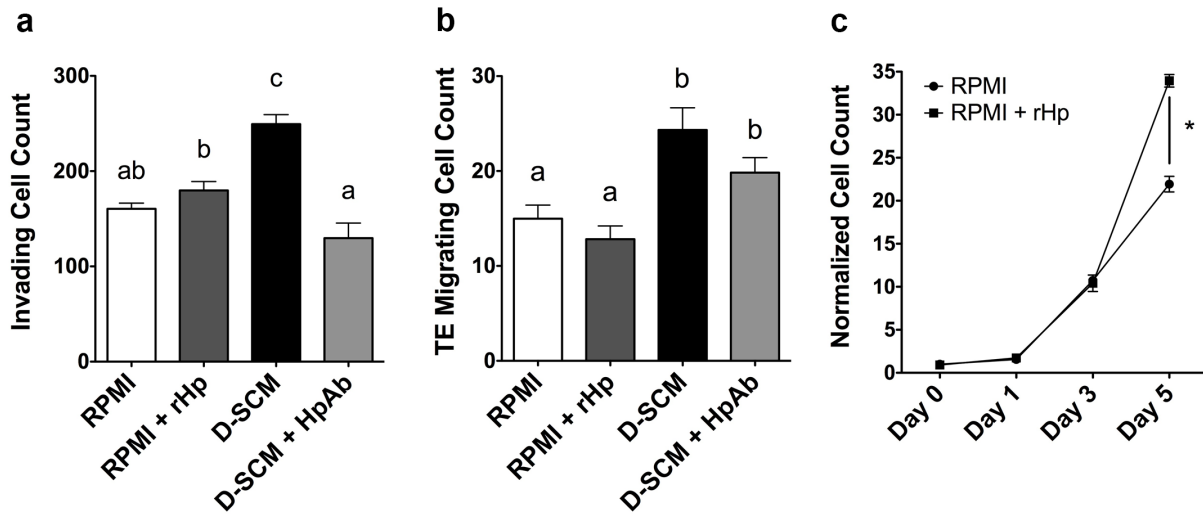

**Supplementary Figure 5 - Effects of haptoglobin mediating MDA-MB-231 phenotypes *in vitro*.** Tumor cell (a) invasion and (b) TE migration of MDA-MB-231 cells cultured in control RPMI, RPMI supplemented with rHp, D-SCM, and D-SCM supplemented with HpAb ( $n = 8$ ). Letters above each data column represent statistical significance, with different letters signifying distinct statistical groups ( $p < 0.05$ ). (c) MDA-MB-231 cell proliferation measured using an MTS assay ( $n = 4$ ,  $*p < 0.05$  compared to RPMI).

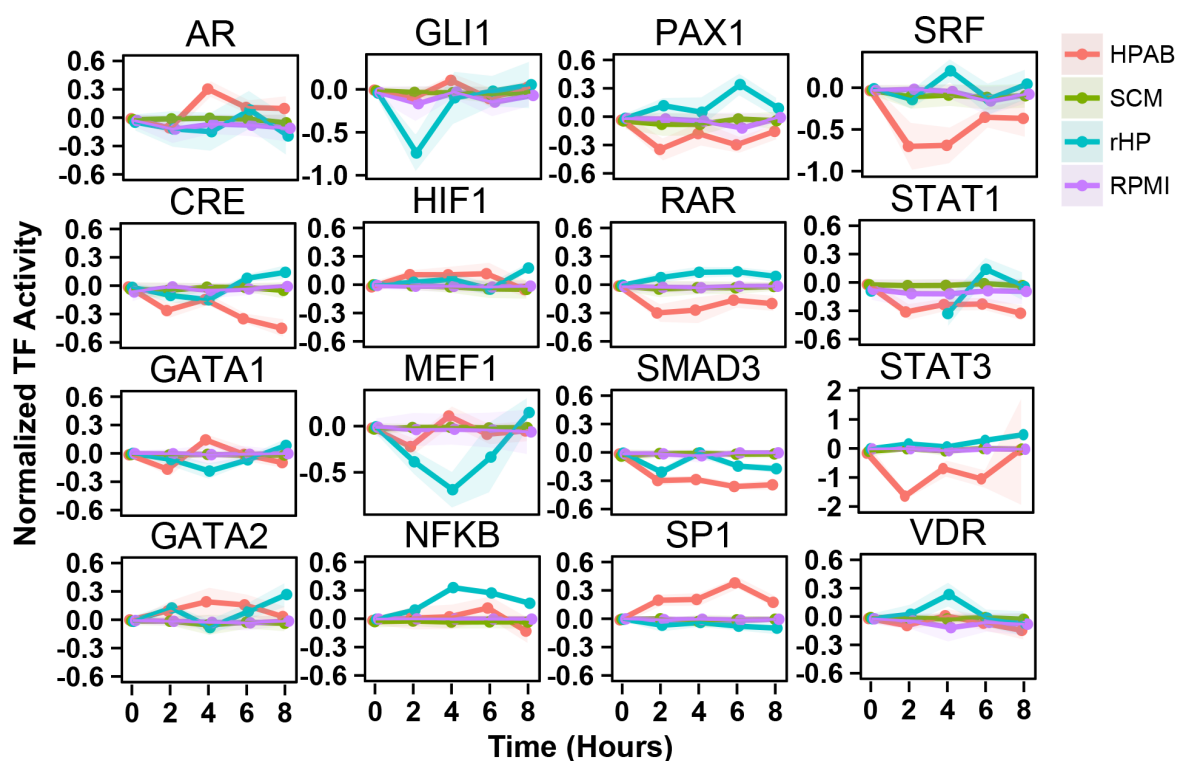

**Supplementary Figure 6 - TF activity of MDA-MB-231 cells cultured in various media measured using TRACER.** TRACER line-plot data showing 16 TF reporter activity profiles for MDA-MB-231 cells cultured in RPMI, RPMI + rHp, D-SCM, and D-SCM + HpAb media over an 8 hour period, normalized to control TA-FLuc activity ( $n = 6$  arrays).

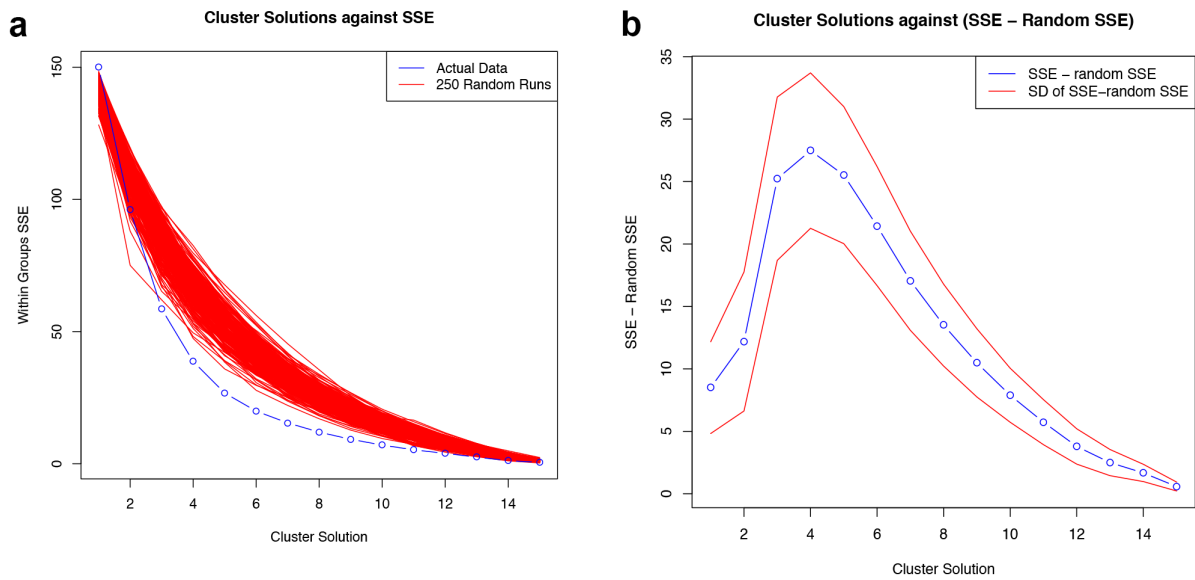

**Supplementary Figure 7 - *K*-clustering analysis of MDA-MB-231 TRACER activity cultured in RPMI vs. rHp and D-SCM vs. D-SCM + HpAb media. (a)** Cluster solutions against sum of squared errors compared to 250 random data set runs. **(b)** Absolute difference between actual and random (mean of all runs) SSE against cluster solutions.
